# Supplementary material
Source: publisher site journal article supplement (https://static.cambridge.org/content/id/urn:cambridge.org:id:article:S002210901900019X/resource/name/S002210901900019Xsupp001.zip)
Supplement: Supplementary file 2 [file S002210901900019Xsupp001.zip]

Archive with 2 entries (1 files):
- suppl_data/
- suppl_data/IA_fxregime-JFQA-FINAL.pdf
